# Supplementary material
Source: PubMed Central journal article supplement (PMC9412785)
Supplement: 41571_2022_671_MOESM1_ESM.pdf [file 41571_2022_671_MOESM1_ESM.pdf]

---

**Supplementary information**

---

**The current state of the art and future trends in RAS-targeted cancer therapies**

---

In the format provided by the authors and unedited

**Supplementary Table 1 | Selected ongoing clinical trials targeting KRAS in advanced-stage cancers**

| <b>Trial</b>                          | <b>Phase</b> | <b>Indication</b>                                                                                      | <b>Agent</b>            | <b>Combination or comparator therapies</b>                                                                                                                                                                                                                                             | <b>Current status and results</b>                                                                                                                                                                                     |
|---------------------------------------|--------------|--------------------------------------------------------------------------------------------------------|-------------------------|----------------------------------------------------------------------------------------------------------------------------------------------------------------------------------------------------------------------------------------------------------------------------------------|-----------------------------------------------------------------------------------------------------------------------------------------------------------------------------------------------------------------------|
| <b>KRAS<sup>G12C</sup> inhibitors</b> |              |                                                                                                        |                         |                                                                                                                                                                                                                                                                                        |                                                                                                                                                                                                                       |
| CodeBreak 100 (NCT03600883)           | Phase I/II   | KRAS <sup>G12C</sup> -mutant solid tumours                                                             | Sotorasib (AMG 510)     | With or without an anti-PD-(L)1 antibody                                                                                                                                                                                                                                               | Phase I: ORR 32.2%; mDoR 10.9 months; mPFS 6.3 months. Phase II, NSCLC cohort: ORR 37.1%; mDoR 11.1 months; mPFS 6.8 months; mOS 12.5 months; Grade ≥3 TRAE rate: 20.6%. PDAC cohort: ORR 21.1%. CRC cohort: ORR 9.7% |
| CodeBreak 101 (NCT04185883)           | Phase I      | KRAS <sup>G12C</sup> -mutant solid tumours                                                             | Sotorasib               | With or without various drugs (trametinib and/or panitumumab, AMG 404, RMC-4630 (SAR442720), afatinib, pembrolizumab, panitumumab ± FOLFIRI, atezolizumab, carboplatin/pemetrexed /docetaxel/ pembrolizumab, palbociclib, everolimus, bevacizumab-awwb + FOLFIRI or FOLFOX, or TNO155) | Recruiting                                                                                                                                                                                                            |
| CodeBreak 200 (NCT04303780)           | Phase III    | Previously treated KRAS <sup>G12C</sup> -mutant NSCLC                                                  | Sotorasib               | Versus docetaxel                                                                                                                                                                                                                                                                       | Active, not recruiting                                                                                                                                                                                                |
| CodeBreak 201 (NCT04933695)           | Phase II     | Previously untreated KRAS <sup>G12C</sup> -mutant stage IV NSCLC                                       | Sotorasib               | NA                                                                                                                                                                                                                                                                                     | Recruiting                                                                                                                                                                                                            |
| Lung-MAP cohort (NCT04625647)         | Phase II     | Previously treated KRAS <sup>G12C</sup> -mutant nonsquamous NSCLC                                      | Sotorasib               | NA                                                                                                                                                                                                                                                                                     | Recruiting                                                                                                                                                                                                            |
| MERIT-lung (NCT05398094)              | Phase II     | Unresectable stage III KRAS <sup>G12C</sup> -mutant NSCLC in patients ineligible for chemoradiotherapy | Sotorasib               | NA                                                                                                                                                                                                                                                                                     | Recruiting                                                                                                                                                                                                            |
| RAMP203 (NCT05074810)                 | Phase I/II   | Previously treated and untreated KRAS <sup>G12C</sup> -mutant NSCLC                                    | Sotorasib               | With VS-6766                                                                                                                                                                                                                                                                           | Recruiting                                                                                                                                                                                                            |
| CodeBreak 105 (NCT04380753)           | Phase I      | KRAS <sup>G12C</sup> -mutant solid tumours in patients of Chinese descent                              | Sotorasib               | NA                                                                                                                                                                                                                                                                                     | Active, not recruiting                                                                                                                                                                                                |
| SOLUCOM (NCT05311709)                 | Phase II     | KRAS <sup>G12C</sup> -mutant NSCLC in patients with comorbidities                                      | Sotorasib               | NA                                                                                                                                                                                                                                                                                     | Recruiting                                                                                                                                                                                                            |
| NCT05054725                           | Phase II     | KRAS <sup>G12C</sup> -mutant NSCLC                                                                     | Sotorasib               | With RMC-4630                                                                                                                                                                                                                                                                          | Recruiting                                                                                                                                                                                                            |
| NCT05400577                           | Phase II     | Stage IB–IIIA KRAS <sup>G12C</sup> -mutant NSCLC                                                       | Sotorasib (neoadjuvant) | NA                                                                                                                                                                                                                                                                                     | Not yet recruiting                                                                                                                                                                                                    |
| NCT05180422                           | Phase I/II   | KRAS <sup>G12C</sup> -mutant NSCLC with asymptomatic brain metastasis                                  | Sotorasib               | With MVASI                                                                                                                                                                                                                                                                             | Recruiting                                                                                                                                                                                                            |

|                                |            |                                                                                                   |                            |                                                                                                             |                                                                                                                                                                                                                                                                                                                                                               |
|--------------------------------|------------|---------------------------------------------------------------------------------------------------|----------------------------|-------------------------------------------------------------------------------------------------------------|---------------------------------------------------------------------------------------------------------------------------------------------------------------------------------------------------------------------------------------------------------------------------------------------------------------------------------------------------------------|
| CodeBreak 300<br>(NCT05198934) | Phase III  | Previously treated<br><i>KRAS</i> <sup>G12C</sup> -mutant CRC                                     | Sotorasib                  | With panitumumab,<br>compared to<br>investigator choice of<br>regorafenib, or<br>trifluridine and tipiracil | Recruiting                                                                                                                                                                                                                                                                                                                                                    |
| NCT05374538                    | Phase I    | <i>KRAS</i> <sup>G12C</sup> -mutant<br>NSCLC                                                      | Sotorasib                  | With VIC-1911                                                                                               | Not yet recruiting                                                                                                                                                                                                                                                                                                                                            |
| NCT05313009                    | Phase I/II | <i>KRAS</i> <sup>G12C</sup> -mutant<br>NSCLC previously<br>treated with <i>KRAS</i><br>inhibitors | Sotorasib                  | With tarloxotinib                                                                                           | Recruiting                                                                                                                                                                                                                                                                                                                                                    |
| NCT05118854                    | Phase II   | Stage IIA–IIIB<br><i>KRAS</i> <sup>G12C</sup> -mutant<br>NSCLC                                    | Sotorasib<br>(neoadjuvant) | With platinum and<br>pemetrexed<br>chemotherapy                                                             | Recruiting                                                                                                                                                                                                                                                                                                                                                    |
| NCT05251038                    | Phase I/II | <i>KRAS</i> <sup>G12C</sup> -mutant<br>PDAC                                                       | Sotorasib                  | With liposomal<br>irinotecan and 5-FU<br>and leucovorin, or<br>gemcitabine and nab-<br>paclitaxel           | Not yet recruiting                                                                                                                                                                                                                                                                                                                                            |
| NCT04892017                    | Phase I/II | <i>KRAS</i> <sup>G12C</sup> -mutant<br>NSCLC                                                      | Sotorasib                  | With DCC-3116                                                                                               | Recruiting                                                                                                                                                                                                                                                                                                                                                    |
| HERKULES-2<br>(NCT04959981)    | Phase I/II | <i>KRAS</i> <sup>G12C</sup> -mutant<br>NSCLC                                                      | Sotorasib                  | With ERAS-601                                                                                               | Recruiting                                                                                                                                                                                                                                                                                                                                                    |
| NCT04720976                    | Phase I/II | Advanced-stage solid<br>tumours                                                                   | Sotorasib                  | With JAB-3312                                                                                               | Recruiting                                                                                                                                                                                                                                                                                                                                                    |
| KRYSTAL-1<br>(NCT03785249)     | Phase I/II | <i>KRAS</i> <sup>G12C</sup> -mutant solid<br>tumours                                              | Adagrasib<br>(MRTX849)     | With or without<br>cetuximab, afatinib or<br>pembrolizumab                                                  | Phase II NSCLC<br>cohort: ORR 42.9%;<br>mDoR 8.5 months;<br>mPFS: 6.5 months;<br>mOS 12.6 months;<br>grade ≥3 TRAE rate:<br>3%.<br>NSCLC brain<br>metastases cohort:<br>intracranial ORR<br>33.3%.<br>Pancreatic and non-<br>CRC GI cancer cohort:<br>ORR 41%; DCR 100%.<br>CRC cohort: ORR 22%<br>with monotherapy, 43%<br>in combination with<br>cetuximab. |
| KRYSTAL-2<br>(NCT04330664)     | Phase I/II | <i>KRAS</i> <sup>G12C</sup> -mutant solid<br>tumours                                              | Adagrasib                  | With or without<br>TNO155                                                                                   | Active, not recruiting                                                                                                                                                                                                                                                                                                                                        |
| KRYSTAL-7<br>(NCT04613596)     | Phase II   | Previously untreated<br><i>KRAS</i> <sup>G12C</sup> -mutant<br>NSCLC                              | Adagrasib                  | With or without<br>pembrolizumab                                                                            | Recruiting                                                                                                                                                                                                                                                                                                                                                    |
| KRYSTAL-10<br>(NCT04793958)    | Phase III  | Second-line treatment<br>of <i>KRAS</i> <sup>G12C</sup> -mutant<br>CRC                            | Adagrasib                  | With cetuximab versus<br>either FOLFOX or<br>FOLFIRI alone                                                  | Recruiting                                                                                                                                                                                                                                                                                                                                                    |
| KRYSTAL-12<br>(NCT04685135)    | Phase III  | Previously treated<br><i>KRAS</i> <sup>G12C</sup> -mutant<br>NSCLC                                | Adagrasib                  | Versus docetaxel                                                                                            | Recruiting                                                                                                                                                                                                                                                                                                                                                    |
| KRYSTAL-14<br>(NCT04975256)    | Phase I    | <i>KRAS</i> <sup>G12C</sup> -mutant solid<br>tumours                                              | Adagrasib                  | With BI 1701963                                                                                             | Active, not recruiting                                                                                                                                                                                                                                                                                                                                        |
| KRYSTAL-16<br>(NCT05178888)    | Phase I    | <i>KRAS</i> <sup>G12C</sup> -mutant solid<br>tumours                                              | Adagrasib                  | With palbociclib                                                                                            | Recruiting                                                                                                                                                                                                                                                                                                                                                    |
| RAMP204<br>(NCT05375994)       | Phase I/II | <i>KRAS</i> <sup>G12C</sup> -mutant<br>NSCLC previously<br>treated with <i>KRAS</i><br>inhibitors | Adagrasib                  | With VS-6766                                                                                                | Not yet recruiting                                                                                                                                                                                                                                                                                                                                            |
| NCT05263986                    | Phase I    | Chinese patients with<br><i>KRAS</i> <sup>G12C</sup> -mutant solid<br>tumours                     | Adagrasib                  | NA                                                                                                          | Recruiting                                                                                                                                                                                                                                                                                                                                                    |

|                                            |             |                                                                                                                                                           |                                                                                  |                                                                                         |                        |
|--------------------------------------------|-------------|-----------------------------------------------------------------------------------------------------------------------------------------------------------|----------------------------------------------------------------------------------|-----------------------------------------------------------------------------------------|------------------------|
| NCT04418661                                | Phase I     | <i>KRAS</i> <sup>G12C</sup> -mutant NSCLC                                                                                                                 | Adagrasib                                                                        | With RMC-4630                                                                           | Recruiting             |
| NCT04449874                                | Phase I     | <i>KRAS</i> <sup>G12C</sup> -mutant solid tumours                                                                                                         | RG6330 (GDC-6036)                                                                | With or without atezolizumab, cetuximab, bevacizumab, erlotinib, GDC-1971 or inavolisib | Recruiting             |
| D1553-101/<br>KEYNOTE-C15<br>(NCT04585035) | Phase Ib/II | <i>KRAS</i> <sup>G12C</sup> -mutant solid tumours                                                                                                         | D-1553                                                                           | With other standard treatments (TBD) in phase II                                        | Recruiting             |
| D1553-102<br>(NCT05383898)                 | Phase I/II  | <i>KRAS</i> <sup>G12C</sup> -mutant NSCLC                                                                                                                 | D-1553                                                                           | NA                                                                                      | Recruiting             |
| D1553-106<br>(NCT05379946)                 | Phase I/II  | <i>KRAS</i> <sup>G12C</sup> -mutant solid tumours                                                                                                         | D-1553                                                                           | With IN10018                                                                            | Not yet recruiting     |
| KontRASt-01<br>(NCT04699188)               | Phase Ib/II | <i>KRAS</i> <sup>G12C</sup> -mutant solid tumours                                                                                                         | JDQ443                                                                           | With or without TNO155 and/or tislelizumab                                              | Recruiting             |
| KontRASt-02<br>(NCT05132075)               | Phase III   | <i>KRAS</i> <sup>G12C</sup> -mutant NSCLC, after platinum-based chemotherapy and immune-checkpoint inhibitor therapy either in sequence or in combination | JDQ443                                                                           | Versus docetaxel                                                                        | Recruiting             |
| KontRASt-03<br>(NCT05358249)               | Phase I/II  | <i>KRAS</i> <sup>G12C</sup> -mutant solid tumours                                                                                                         | JDQ443                                                                           | With trametinib, ribociclib or cetuximab                                                | Not yet recruiting     |
| NCT04956640                                | Phase I     | <i>KRAS</i> <sup>G12C</sup> -mutant solid tumours                                                                                                         | LY3537982                                                                        | With abemaciclib, pembrolizumab, erlotinib, temuterkib, LY3295668, cetuximab or TNO155  | Recruiting             |
| NCT04973163                                | Phase I     | <i>KRAS</i> <sup>G12C</sup> -mutant solid tumours                                                                                                         | BI 1823911                                                                       | With BI 1701963                                                                         | Recruiting             |
| NCT05009329                                | Phase I/II  | <i>KRAS</i> <sup>G12C</sup> -mutant solid tumours                                                                                                         | JAB-21822                                                                        | NA                                                                                      | Recruiting             |
| NCT05194995                                | Phase I/II  | <i>KRAS</i> <sup>G12C</sup> -mutant CRC, small intestine cancer or appendiceal cancer                                                                     | JAB-21822                                                                        | With cetuximab                                                                          | Recruiting             |
| NCT05002270                                | Phase I/II  | <i>KRAS</i> <sup>G12C</sup> -mutant solid tumours                                                                                                         | JAB-21822                                                                        | Alone or with cetuximab                                                                 | Recruiting             |
| NCT05276726                                | Phase I/II  | <i>KRAS</i> <sup>G12C</sup> -mutant NSCLC with <i>STK11</i> co-mutation and wild-type <i>KEAP1</i>                                                        | JAB-21822                                                                        | NA                                                                                      | Not yet recruiting     |
| NCT05288205                                | Phase I/II  | <i>KRAS</i> <sup>G12C</sup> -mutant solid tumours                                                                                                         | JAB-21822                                                                        | JAB-3312                                                                                | Recruiting             |
| NCT04006301                                | Phase I     | <i>KRAS</i> <sup>G12C</sup> -mutant solid tumours                                                                                                         | JNJ-74699157 (ARS-3248)                                                          | NA                                                                                      | Completed              |
| NCT05067283                                | Phase I     | <i>KRAS</i> <sup>G12C</sup> -mutant solid tumours                                                                                                         | MK-1084                                                                          | Alone or with pembrolizumab                                                             | Recruiting             |
| <b>Pan-RAS inhibitors</b>                  |             |                                                                                                                                                           |                                                                                  |                                                                                         |                        |
| NCT05379985                                | Phase I     | <i>KRAS</i> <sup>G12C</sup> -mutant solid tumours                                                                                                         | RMC-6236                                                                         | NA                                                                                      | Recruiting             |
| <b>siRNAs</b>                              |             |                                                                                                                                                           |                                                                                  |                                                                                         |                        |
| 2018-0126<br>(NCT03608631)                 | Phase I     | <i>KRAS</i> <sup>G12D</sup> -mutant stage IV PDAC                                                                                                         | iExosomes (exosomes delivering siRNA targeting <i>KRAS</i> <sup>G12D</sup> mRNA) | NA                                                                                      | Recruiting             |
| <b>SOS1-KRAS interaction inhibitors</b>    |             |                                                                                                                                                           |                                                                                  |                                                                                         |                        |
| KRYSTAL-14<br>(NCT04975256)                | Phase I     | <i>KRAS</i> <sup>G12C</sup> -mutant solid tumours                                                                                                         | BI 1701963                                                                       | With adagrasib                                                                          | Active, not recruiting |
| NCT04973163                                | Phase I     | <i>KRAS</i> -mutant- solid tumours                                                                                                                        | BI 1701963                                                                       | With BI 1823911                                                                         | Recruiting             |
| 1432-0001<br>(NCT04111458)                 | Phase I     | <i>KRAS</i> -mutant solid tumours                                                                                                                         | BI 1701963                                                                       | With or without trametinib                                                              | Active, not recruiting |

| <b><i>SHP2 inhibitors</i></b>                    |             |                                                                                                                    |                                                                                                                                                     |                                                |                        |
|--------------------------------------------------|-------------|--------------------------------------------------------------------------------------------------------------------|-----------------------------------------------------------------------------------------------------------------------------------------------------|------------------------------------------------|------------------------|
| NCT05054725                                      | Phase II    | <i>KRAS</i> <sup>G12C</sup> -mutant NSCLC                                                                          | RMC-4630                                                                                                                                            | With sotorasib                                 | Recruiting             |
| CodeBreak 101 (NCT04185883)                      | Phase I     | <i>KRAS</i> <sup>G12C</sup> -mutant solid tumours                                                                  | RMC-4630                                                                                                                                            | With sotorasib                                 | Recruiting             |
| NCT04418661                                      | Phase I     | <i>KRAS</i> <sup>G12C</sup> -mutant NSCLC                                                                          | RMC-4630                                                                                                                                            | With adagrasib                                 | Recruiting             |
| NCT04916236                                      | Phase I     | <i>KRAS</i> <sup>G12C</sup> -mutant solid tumours                                                                  | RMC-4630                                                                                                                                            | With LY3214996                                 | Recruiting             |
| NCT03989115                                      | Phase I/II  | <i>KRAS</i> -mutant or <i>KRAS</i> -amplified solid tumours                                                        | RMC-4630                                                                                                                                            | With cobimetinib                               | Active, not recruiting |
| NCT03634982                                      | Phase I     | <i>KRAS</i> -amplified solid tumours or <i>KRAS</i> <sup>G12C</sup> -mutant NSCLC                                  | RMC-4630                                                                                                                                            | NA                                             | Recruiting             |
| CodeBreak 101 (NCT04185883)                      | Phase I     | <i>KRAS</i> <sup>G12C</sup> -mutant solid tumours                                                                  | TNO155                                                                                                                                              | With sotorasib                                 | Recruiting             |
| KRYSTAL-2 (NCT04330664)                          | Phase I/II  | <i>KRAS</i> <sup>G12C</sup> -mutant solid tumours                                                                  | TNO155                                                                                                                                              | With adagrasib                                 | Active, not recruiting |
| KontRASt-01 (NCT04699188)                        | Phase Ib/II | <i>KRAS</i> <sup>G12C</sup> -mutant solid tumours                                                                  | TNO155                                                                                                                                              | With JDQ443 ± tislelizumab                     | Recruiting             |
| NCT04956640                                      | Phase I     | <i>KRAS</i> <sup>G12C</sup> -mutant solid tumours                                                                  | TNO155                                                                                                                                              | With LY3537982                                 | Recruiting             |
| NCT04000529                                      | Phase I     | <i>KRAS</i> <sup>G12C</sup> -mutant NSCLC or CRC                                                                   | TNO155                                                                                                                                              | With spartalizumab (NSCLC) or ribociclib (CRC) | Recruiting             |
| NCT03114319                                      | Phase I     | Advanced-stage solid tumours, including <i>KRAS</i> <sup>G12C</sup> -mutant NSCLC                                  | TNO155                                                                                                                                              | NA                                             | Recruiting             |
| NCT04720976                                      | Phase I/II  | <i>KRAS</i> <sup>G12C</sup> -mutant solid tumours                                                                  | JAB-3312                                                                                                                                            | With sotorasib                                 | Recruiting             |
| NCT05288205                                      | Phase I/II  | <i>KRAS</i> <sup>G12C</sup> -mutant solid tumours                                                                  | JAB-3312                                                                                                                                            | With JAB-21822                                 | Recruiting             |
| GO42144 (NCT04449874)                            | Phase I     | <i>KRAS</i> <sup>G12C</sup> -mutant solid tumours                                                                  | GDC-1971                                                                                                                                            | With RG6330                                    | Recruiting             |
| HERKULES-2 (NCT04959981)                         | Phase I/II  | <i>KRAS</i> <sup>G12C</sup> -mutant NSCLC                                                                          | ERAS-601                                                                                                                                            | With sotorasib                                 | Recruiting             |
| <b><i>Aurora Kinase Inhibitors</i></b>           |             |                                                                                                                    |                                                                                                                                                     |                                                |                        |
| NCT05374538                                      | Phase I     | <i>KRAS</i> <sup>G12C</sup> -mutant NSCLC                                                                          | VIC-1911                                                                                                                                            | With sotorasib                                 | Not yet recruiting     |
| <b><i>ULK Inhibitors</i></b>                     |             |                                                                                                                    |                                                                                                                                                     |                                                |                        |
| NCT04892017                                      | Phase I/II  | <i>KRAS</i> <sup>G12C</sup> -mutant NSCLC                                                                          | DCC-3116                                                                                                                                            | With sotorasib                                 | Recruiting             |
| <b><i>KRAS-targeted therapeutic vaccines</i></b> |             |                                                                                                                    |                                                                                                                                                     |                                                |                        |
| V941-001 (NCT03948763)                           | Phase I     | <i>KRAS</i> <sup>G12C/G12D/G12V/G13D</sup> -mutant NSCLC, CRC, or PDAC (with HLA-A11:01 and/or HLA-C08:02 alleles) | mRNA-5671/V941 (targeting <i>KRAS</i> <sup>G12C</sup> , <i>KRAS</i> <sup>G12D</sup> , <i>KRAS</i> <sup>G12V</sup> and <i>KRAS</i> <sup>G13D</sup> ) | With or without pembrolizumab                  | Active, not recruiting |
| NCT04117087                                      | Phase I     | Previously treated <i>KRAS</i> -mutant pMMR/MSS CRC, or resected PDAC (after neoadjuvant/adjuvant therapy)         | Mutant <i>KRAS</i> -targeted long-peptide vaccine                                                                                                   | With nivolumab and ipilimumab                  | Recruiting             |

|                                 |            |                                                                                                         |                                                                                                                                                                                        |    |            |
|---------------------------------|------------|---------------------------------------------------------------------------------------------------------|----------------------------------------------------------------------------------------------------------------------------------------------------------------------------------------|----|------------|
| UPCC 04218<br>(NCT03592888)     | Phase I    | <i>KRAS</i> <sup>G12C/G12D/G12R/G12V</sup> -mutant PDAC (resectable)                                    | mDC3/8-KRAS vaccine (autologous mature dendritic cells pulsed with mutant KRAS peptides specific to a patient's tumour mutation and HLA type)                                          | NA | Recruiting |
| AMPLIFY-201<br>(NCT04853017)    | Phase I    | <i>KRAS</i> <sup>G12D/G12R</sup> -mutant solid tumours (adjuvant treatment of minimal residual disease) | ELI-002 P2 (a mixture of two lipid-conjugated peptide-based KRAS antigens, Amph-G12D and Amph-G12R, admixed with a lipid-conjugated immune-stimulatory oligonucleotide, Amph-CpG-7909) | NA | Recruiting |
| <b>Adoptive cell therapy</b>    |            |                                                                                                         |                                                                                                                                                                                        |    |            |
| ChanghaiH-PP06<br>(NCT04146298) | Phase I/II | <i>KRAS</i> <sup>G12V</sup> -mutant PDAC (with HLA-A*11:01 allele)                                      | Autologous T cells transduced with <i>KRAS</i> <sup>G12V</sup> -specific TCRs                                                                                                          | NA | Recruiting |

5-FU, 5-fluorouracil; CRC, colorectal cancer; DCR, disease control rate; FOLFIRI, folinic acid, 5-fluorouracil and irinotecan; FOLFOX, folinic acid, 5-fluorouracil and oxaliplatin; GI, gastrointestinal mDoR, median duration of response; mPFS, median progression-free survival; mOS, median overall survival; MSS/pMMR, microsatellite stable/mismatch repair proficient; MRD, minimal residual disease; NA, not applicable; NSCLC, non-small-cell lung cancer; ORR, objective response rate; PDAC, pancreatic ductal adenocarcinoma; siRNA, small interfering RNA; TBD, to be disclosed; TCRs, T cell receptors; TRAE, treatment-related adverse event.
